# Supplementary material for: A Pathophysiological Approach to Spontaneous Orbital Meningoceles: Case Report and Systematic Review
Source: MDPI journal article supplement (doi:10.3390/jpm14050465), 2024-04-28
Supplement: s1 [file s1]

Supplementary Table S1. Assessment of ethical compliance and completeness in the presentation of the 29 selected articles in accordance with the Joanna Briggs Institute (JBI) checklist.

|                                                                                      | Yes            | No             | Unclear                  | Not applicable |
|--------------------------------------------------------------------------------------|----------------|----------------|--------------------------|----------------|
| Were patient's demographic characteristics clearly described?                        | 28             | 1              |                          |                |
| Was the patient's history clearly described and presented as a timeline?             | 3              | 23             | 3                        |                |
| Was the current clinical condition of the patient on presentation clearly described? | 25             | 3              | 1                        |                |
| Were diagnostic tests or assessment methods and the results clearly described?       | 25             | 2              | 2                        |                |
| Was the intervention(s) or treatment procedure(s) clearly described?                 | 17             | 6              | 1                        | 5              |
| Was the post-intervention clinical condition clearly described?                      | 16             | 7              | 1                        | 5              |
| Were adverse events (harms) or unanticipated events identified and described?        | 9              | 13             | 1                        | 6              |
| Does the case report provide takeaway lessons?                                       | 14             | 10             | 5                        |                |
| <b>Overall appraisal</b>                                                             | <b>Include</b> | <b>Exclude</b> | <b>Seek further info</b> |                |
|                                                                                      | 29             | 0              | 0                        |                |
